# Supplementary material for: Histidine-Rich Glycoprotein Suppresses the S100A8/A9-Mediated Organotropic Metastasis of Melanoma Cells
Source: MDPI journal article supplement (doi:10.3390/ijms231810300), 2022-09-07
Supplement: s1 [file s1]

Supplementary Information  
Tomonobu et al.

BP1

| Group (#) | Spectra (#) | Distinct Peptides (#) | Distinct Summed MS/MS Search Score | % AA Coverage | Mean Peptide Spectral Intensity | Protein MW (Da) | Protein pI | Species | Database Accession # | Protein Name                                     |
|-----------|-------------|-----------------------|------------------------------------|---------------|---------------------------------|-----------------|------------|---------|----------------------|--------------------------------------------------|
| 1         | 134         | 15                    | 277.01                             | 32.1          | 4.77e+008                       | 60563.9         | 7.09       | HUMAN   | P04196               | Histidine-rich glycoprotein                      |
| 2         | 1           | 1                     | 13.02                              | 0.9           | 9.03e+007                       | 155869.0        | 5.52       | HUMAN   | Q99683               | Mitogen-activated protein kinase kinase kinase 5 |
| Totals:   | 135         | 16                    |                                    |               |                                 |                 |            |         |                      |                                                  |

HRG

BP2

| Group (#) | Spectra (#) | Distinct Peptides (#) | Distinct Summed MS/MS Search Score | % AA Coverage | Mean Peptide Spectral Intensity | Protein MW (Da) | Protein pI | Species | Database Accession # | Protein Name                |
|-----------|-------------|-----------------------|------------------------------------|---------------|---------------------------------|-----------------|------------|---------|----------------------|-----------------------------|
| 1         | 139         | 16                    | 281.84                             | 32.3          | 5.39e+008                       | 60563.9         | 7.09       | HUMAN   | P04196               | Histidine-rich glycoprotein |
| Totals:   | 139         | 16                    |                                    |               |                                 |                 |            |         |                      |                             |

HRG

BP3

| Group (#) | Spectra (#) | Distinct Peptides (#) | Distinct Summed MS/MS Search Score | % AA Coverage | Mean Peptide Spectral Intensity | Protein MW (Da) | Protein pI | Species | Database Accession # | Protein Name                                     |
|-----------|-------------|-----------------------|------------------------------------|---------------|---------------------------------|-----------------|------------|---------|----------------------|--------------------------------------------------|
| 1         | 124         | 14                    | 251.87                             | 28.3          | 5.68e+008                       | 60563.9         | 7.09       | HUMAN   | P04196               | Histidine-rich glycoprotein                      |
| 2         | 1           | 1                     | 13.83                              | 0.9           | 9.81e+007                       | 155869.0        | 5.52       | HUMAN   | Q99683               | Mitogen-activated protein kinase kinase kinase 5 |
| 3         | 1           | 1                     | 13.59                              | 3             | 9.78e+008                       | 79990.4         | 7.85       | HUMAN   | P29973               | cGMP-gated cation channel alpha-1                |
| Totals:   | 126         | 16                    |                                    |               |                                 |                 |            |         |                      |                                                  |

HRG

Supplementary figure legends

**Figure S1. Identification of protein(s) interacting with S100A8/A9.** Three bands, BP1, 2 and 3, clearly stained with CBB, that bound with the single GST-S100A9 as well as the mixture of GST-S100A8 and GST-S100A9 in a consistent manner, were subjected to a liquid chromatography–tandem mass spectrometry (LC-MS/MS) analysis; the results are displayed as a modified list.

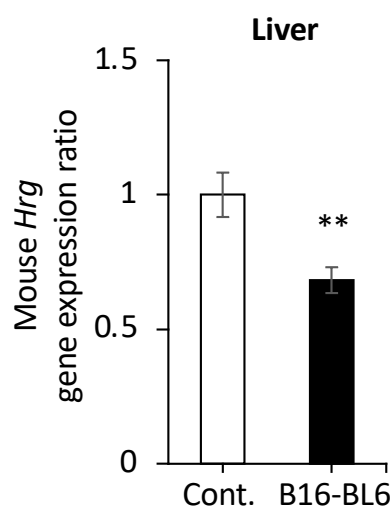

**Figure S2. Change in the expression of HRG in melanoma-burdened mice.** Because the liver is the main source of HRG production, the livers were also resected from mouse melanoma (B16-BL6 cells)-burdened C57BL/6J mice at the same time point (Day 7) as in the experiment shown in [Figure 4A](#). The resected livers were analyzed for *Hrg* gene expression levels. *Tbp* mRNA was used as a control for the analysis. The abbreviation Cont. represents healthy liver from the non-tumor burdened control mice. B16-BL6 represents a diseased liver from mouse melanoma (B16-BL6 cells)-burdened mice.
